# Supplementary material for: Revealing the order–disorder type phase transition mechanism in two new supramolecular clathrates
Source: Royal Society of Chemistry journal article supplement (doi:10.1039/d2ce01419j), 2023-01-01
Supplement: d2ce01419j1.pdf [file d2ce01419j1.pdf]

## **Supporting Information for**

### **Revealing the order–disorder type phase transition mechanism in two new supramolecular clathrates**

Wen-Juan Wei,<sup>\*ab</sup> Hong-Qiang Gao,<sup>a</sup> Ming Fang,<sup>\*a</sup> Yun-Zhi Tang<sup>b</sup> and Yen Wei<sup>\*a</sup>

## EXPERIMENTAL SECTION

**Synthesis.** All the reagents and solvents used were of commercially available quality.

**1** and **2** was obtained by slow evaporation of a solution of mixed methanol solution (10 mL) containing nortropine (1 mmol, 0.130 g), 18-crown-6 (1 mmol, 0.264 g) and perchloric acid or tetrafluoroborate acid (1 mmol) at room temperature. The large colorless block single crystals of **1** and **2** were obtained after about 2 weeks.

**Powder X-ray diffraction.** Room temperature powder X-ray diffraction (PXRD) experiments of **1** and **2** were performed on a Rigaku D/MAX 2000 PC X-ray diffraction instrument with Cu radiation ( $K_{\alpha 1}=1.54060 \text{ \AA}$ ,  $K_{\alpha 2}=1.54443 \text{ \AA}$ ). Variable temperature PXRD experiments of **1** and **2** were carried out on a Bruker D8 Discovery diffractometer with Cu radiation ( $K_{\alpha 1}=1.54060 \text{ \AA}$ ,  $K_{\alpha 2}=1.54443 \text{ \AA}$ ). The data were collected in the temperature range 298-445 K for  $\theta$  range from 5 to 70°.

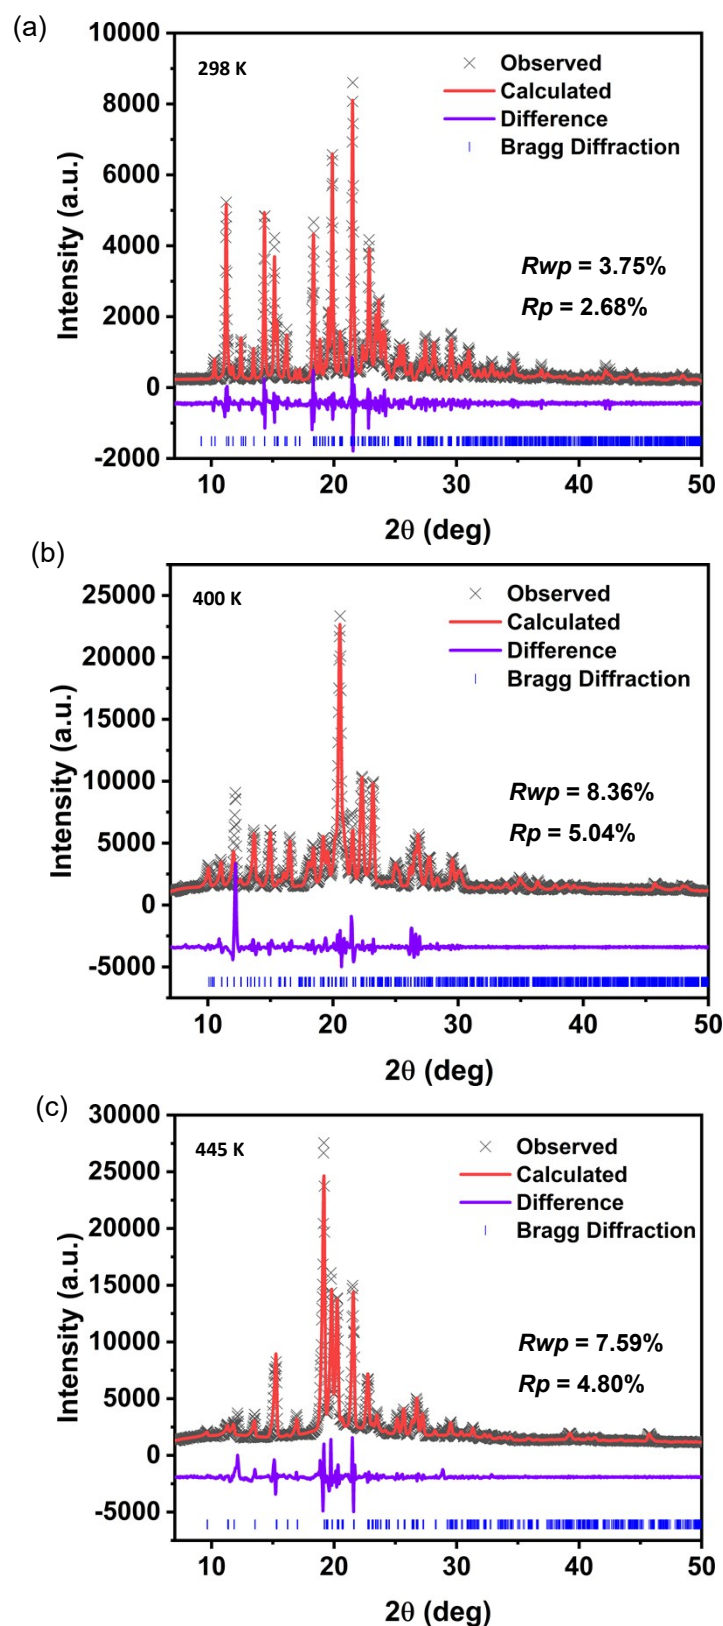

**Figure S1.** Patterns of the powder X-rays diffraction (PXRD) and simulated ones from the single-crystal structures of **1** at 298, 400 and 445 K.

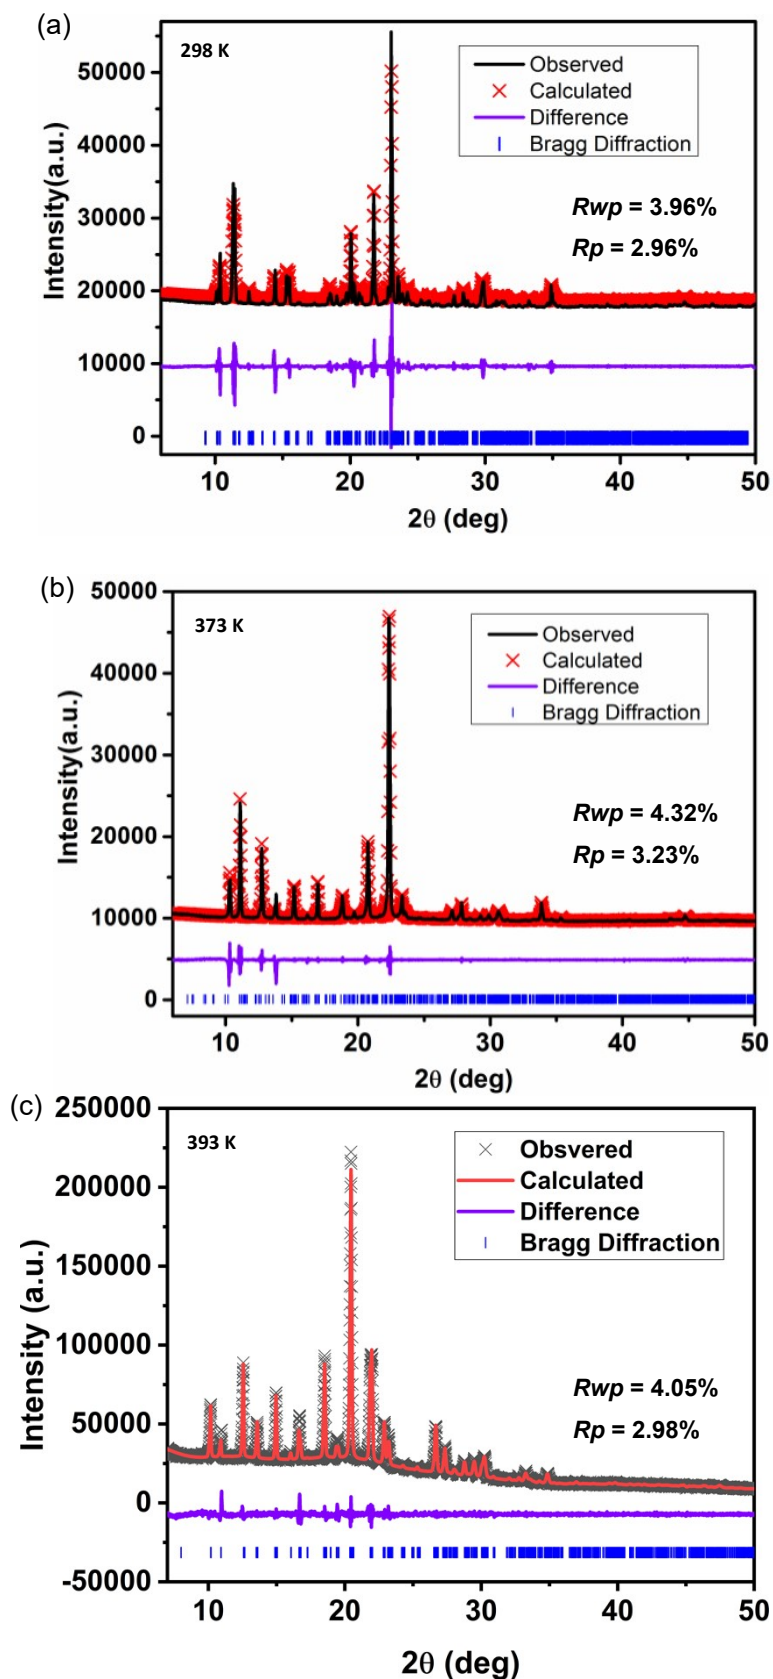

**Figure S2.** Patterns of the powder X-rays diffraction (PXRD) and simulated ones from the single-crystal structures of **2** at 298 K (a), 373 K (b) and 393 K (c) high-temperatures. The PXRD patterns matches very well the patterns simulated from the single-crystal structures.

**DSC and TGA.** Differential scanning calorimetry (DSC) measurements were conducted using a TA Q2000 DSC instrument. The DSC runs were recorded on cooling and on heating the powdered sample at the rate of temperature changes of 10 K/min. Indium standard was used for the temperature and enthalpy calibration. Thermogravimetric analysis (TGA) measurement was performed on a TA-Instruments STD2960 system from room temperature to 1050 K in nitrogen atmosphere at a rate of 10 K/min (Figure S3), indicating that **1** and **2** can be stable up to 453 K and 423 K when a dehydration process occurs.

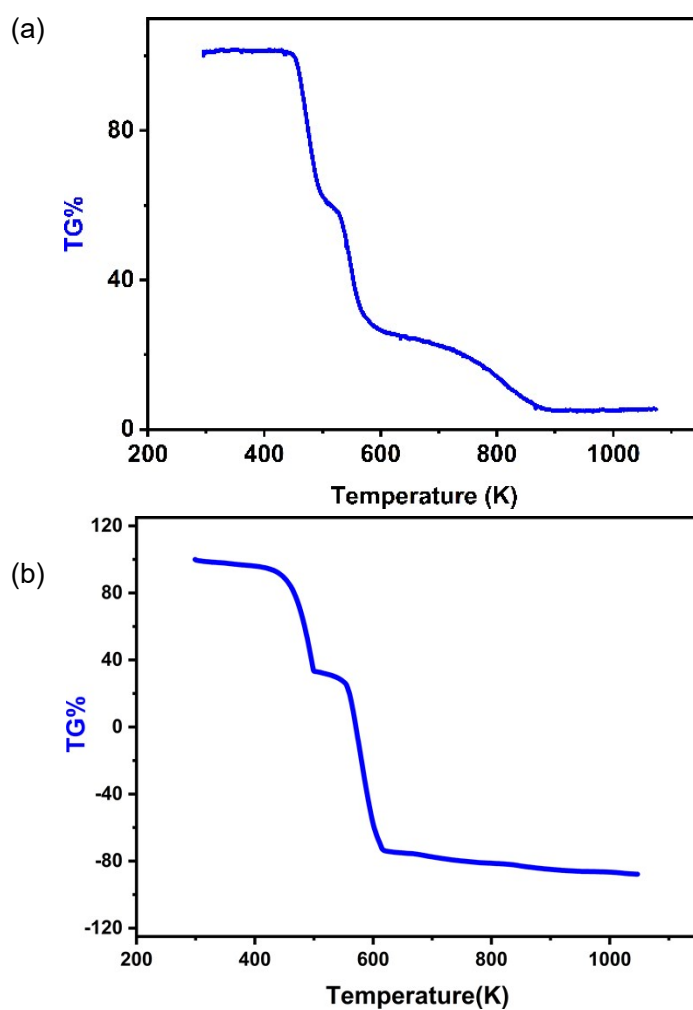

**Figure S3.** The thermogravimetric analysis of **1** (a) and **2** (b) in the range of 300-1050 K.

**Single Crystal X-ray Diffraction.** Single crystal X-ray diffractions were carried out with graphite monochromated Mo radiation ( $\lambda = 0.71073 \text{ \AA}$ ) on an Oxford Diffraction Gemini E Ultra diffractometer. Data sets were collected by using *CrysAlis<sup>Pro</sup>* software. The program Olex2-1.2 was employed as an interface to invoke program SHELXS97 and SHELXL97 executables.<sup>1</sup> The crystal structures were solved by direct methods with SHELXS97 and refined by full-matrix least squares on  $F^2$  with anisotropic atomic displacement parameters for all non-hydrogen atoms using SHELXL97.<sup>2, 3</sup> All H atoms were located from molecular geometric calculations and refined with isotropic temperature parameters. The crystallographic information of **1** and **2** crystal structures were listed in the Table S1. These data can be obtained free of charge from the Cambridge Crystallographic Data Centre (CCDC) via [www.ccdc.cam.ac.uk/data\\_request/cif](http://www.ccdc.cam.ac.uk/data_request/cif) (CCDC 2203857-2203862).

**Table S1.** Crystal data and structure refinement details for **1** at 200, 300, 365 K and **2** at 173, 293, 350 K, respectively. The crystal data of **2** at 373.15 K are refined from the corresponding high-temperature powder X-rays diffraction.

| Crystal                     | <b>1</b> (LTP)                     | <b>1</b> (LTP)                                    | <b>1</b> (LTP)                                    | <b>2</b> (LTP)                                     | <b>2</b> (RTP)                                     | <b>2</b> (RTP)                                     | <b>2</b> (HTP)                                     |
|-----------------------------|------------------------------------|---------------------------------------------------|---------------------------------------------------|----------------------------------------------------|----------------------------------------------------|----------------------------------------------------|----------------------------------------------------|
| Empirical                   | C <sub>19</sub> H <sub>38</sub> Cl | C <sub>19</sub> H <sub>38</sub> ClNO <sub>1</sub> | C <sub>19</sub> H <sub>38</sub> ClNO <sub>1</sub> | C <sub>19</sub> H <sub>38</sub> BF <sub>4</sub> NO |
| Formula weight              | 491.95                             | 491.95                                            | 491.95                                            | 479.31                                             | 479.31                                             | 479.31                                             | 479.31                                             |
| Crystal system              | orthorho                           | orthorhombic                                      | orthorhombic                                      | orthorhombic                                       | orthorhombic                                       | orthorhombic                                       | orthorhombic                                       |
| Space group                 | <i>Pbca</i>                        | <i>Pbca</i>                                       | <i>Pnma</i>                                       | <i>Pbca</i>                                        | <i>Pbca</i>                                        | <i>Pbca</i>                                        | <i>Pnma</i>                                        |
| Temperature (K)             | 200.04(1)                          | 300.00(10)                                        | 365.01(11)                                        | 173.00(10)                                         | 300.80(10)                                         | 350(2)                                             | 373.15(2)                                          |
| <i>a</i> / Å                | 17.1801(                           | 17.3155(8)                                        | 15.6730(17)                                       | 17.1067(7)                                         | 17.2870(6)                                         | 17.3460(16)                                        | 17.1726                                            |
| <i>b</i> / Å                | 15.4816(                           | 15.6324(9)                                        | 10.8757(9)                                        | 15.3661(7)                                         | 15.6308(5)                                         | 15.8138(15)                                        | 15.8594                                            |
| <i>c</i> / Å                | 17.8001(                           | 17.8689(9)                                        | 14.2780(15)                                       | 17.6923(8)                                         | 17.7593(6)                                         | 17.7610(20)                                        | 17.5853                                            |
| $\alpha$ / °                | 90                                 | 90                                                | 90                                                | 90                                                 | 90                                                 | 90                                                 | 90                                                 |
| $\beta$ / °                 | 90                                 | 90                                                | 90                                                | 90                                                 | 90                                                 | 90                                                 | 90                                                 |
| $\gamma$ / °                | 90                                 | 90                                                | 90                                                | 90                                                 | 90                                                 | 90                                                 | 90                                                 |
| <i>V</i> / Å <sup>3</sup>   | 4734.4(2)                          | 4836.8(4)                                         | 2433.8(4)                                         | 4650.7(4)                                          | 4798.7(3)                                          | 4872.0(8)                                          | 4789.3                                             |
| Z                           | 8                                  | 8                                                 | 4                                                 | 8                                                  | 8                                                  | 8                                                  | 4                                                  |
| $\rho$ / g cm <sup>-3</sup> | 1.380                              | 1.351                                             | 1.343                                             | 1.369                                              | 1.327                                              | 1.307                                              | -                                                  |
| $\mu$ / mm <sup>-1</sup>    | 0.219                              | 0.215                                             | 0.213                                             | 0.121                                              | 0.117                                              | 0.115                                              | -                                                  |
| GOF on $F^2$                | 1.049                              | 1.025                                             | 2.479                                             | 1.028                                              | 1.069                                              | 0.834                                              | -                                                  |

|                                                                                                                          |        |        |        |        |        |        |   |
|--------------------------------------------------------------------------------------------------------------------------|--------|--------|--------|--------|--------|--------|---|
| $R_1, [I > 2\sigma(I)]^a$                                                                                                | 0.0383 | 0.0579 | 0.2497 | 0.0477 | 0.0557 | 0.1044 | - |
| $wR_2, [I > 2\sigma(I)]^b$                                                                                               | 0.0986 | 0.1759 | 0.6590 | 0.1089 | 0.1751 | 0.3211 | - |
| $^a R_1 = \Sigma  F_o  -  F_c   / \Sigma F_o  \quad ^b wR_2 = \{\Sigma[w(F_o^2 - F_c^2)^2] / \Sigma[w(F_o^2)^2]\}^{1/2}$ |        |        |        |        |        |        |   |

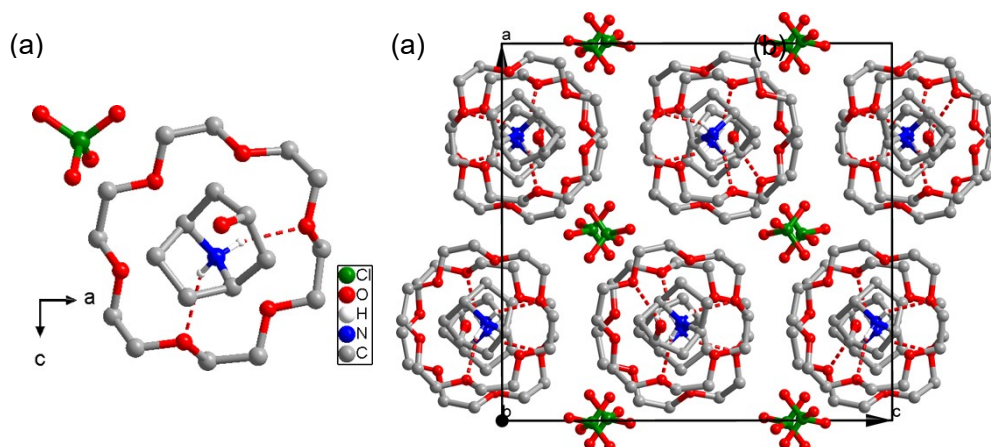

**Figure S4.** (a) Asymmetric units of **1** in the disordered structure of Low-temperature phase at 200 K. Dashed lines represent hydrogen bonds N–H···O. (b) The crystallographic packing diagrams of **1** viewed along the *c*-axis. Hydrogen atoms bonded to the C atoms were omitted for clarity. Dashed lines represent hydrogen bonds N–H···O and O–H···O.

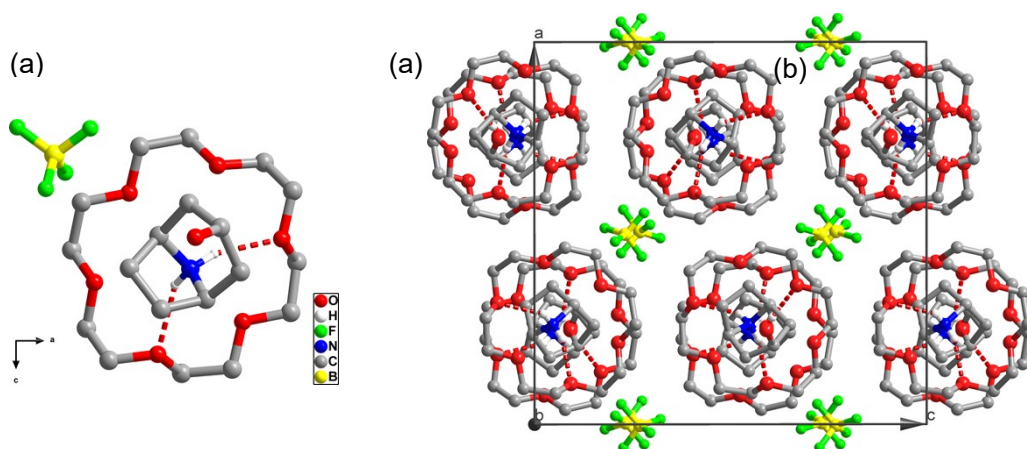

**Figure S5.** (a) Asymmetric units of **2** in the disordered structure of Low-temperature phase at 350 K. Dashed lines represent hydrogen bonds N–H···O. (b) The crystallographic packing diagrams of **2** viewed along the *c*-axis in the LTP at 350 K. Hydrogen atoms bonded to the C atoms were omitted for clarity. Dashed lines represent hydrogen bonds N–H···O and O–H···O.



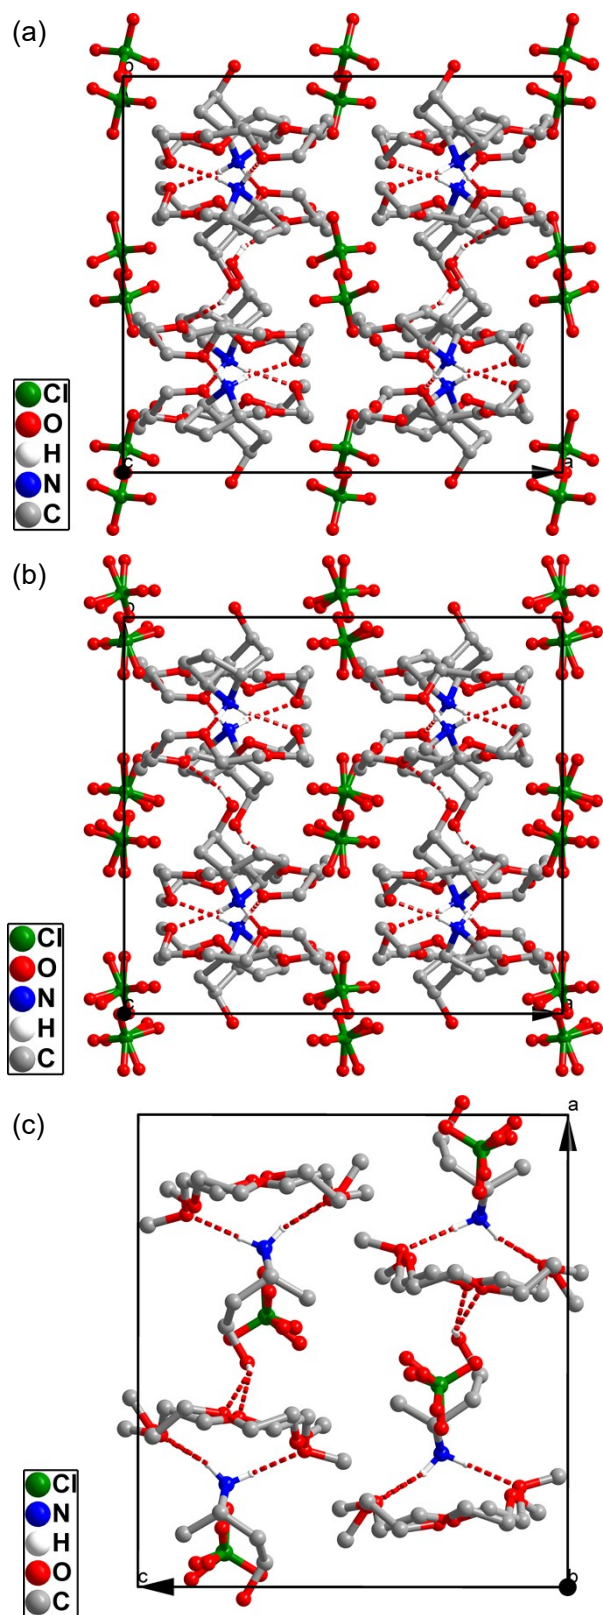

**Figure S6.** The crystallographic packing diagrams of **1** viewed along the *c*-axis in the LTP at 200 K (a), RTP at 293 K (b) and ITP at 365 K (c). Hydrogen atoms bonded to the C atoms were omitted for clarity. Dashed lines represent hydrogen bonds N–H···O and O–H···O.

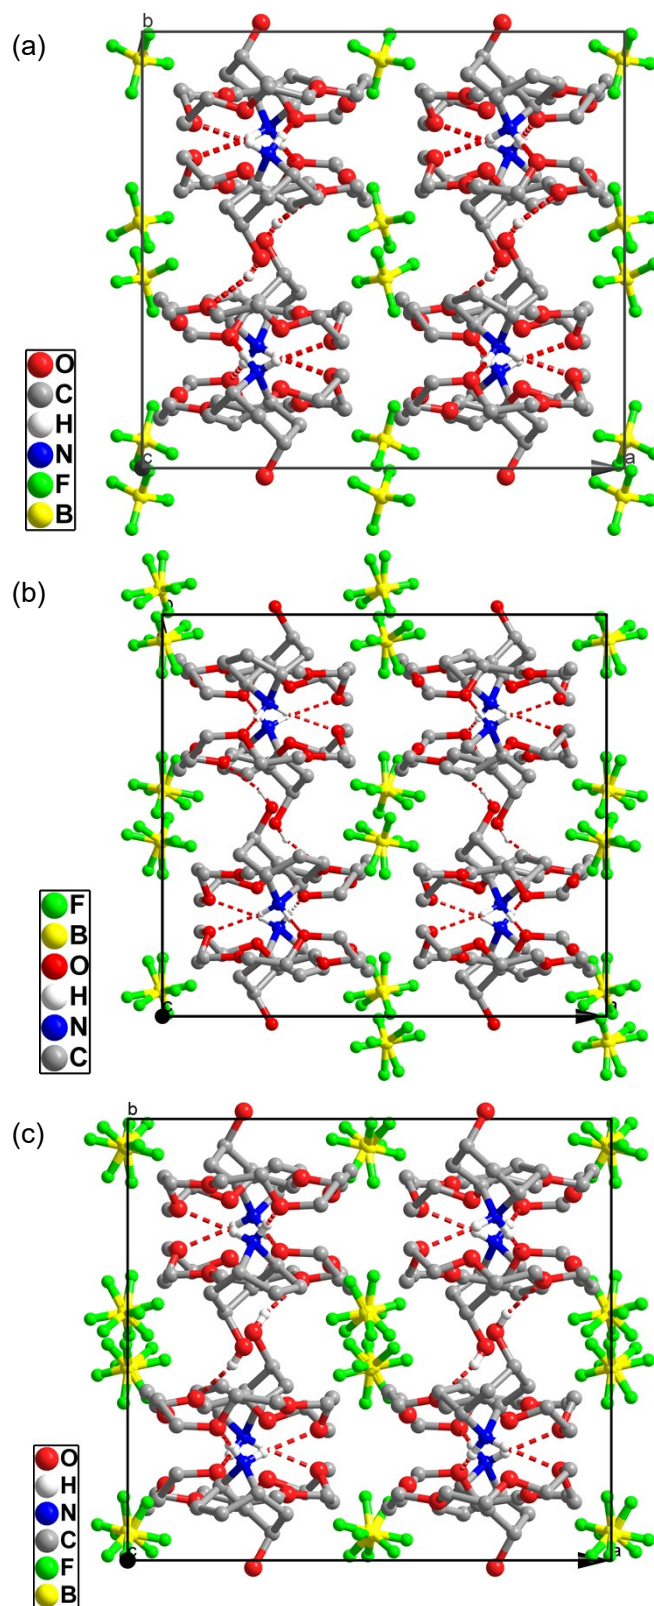

**Figure S7.** The crystallographic packing diagrams of **2** viewed along the *c*-axis in LTP at 173 K (a), RTP at 293 K (b) and at 350 K (c). Hydrogen atoms bonded to the C atoms were omitted for clarity. Dashed lines represent hydrogen bonds N–H···O and O–H···O.

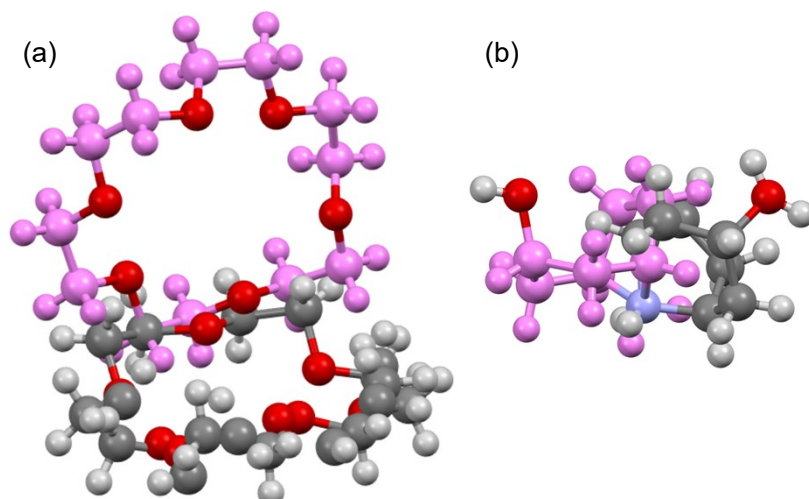

**Figure S8.** The conformational change of crown ether (a) and NRT (b) moiety in phase-I (carmine) and phase-III (gray) of **1** by providing an overlapping molecular image using mercury program.

**IR and Raman spectroscopy characterization.** IR spectra of the title compound were recorded on a Perkin-Elmer spectrum 2000 operating at  $4\text{ cm}^{-1}$  resolution. Variable-temperature Raman measurements were carried out in a HORIBA equipped with a  $50\times$  (0.75 N.A.) objective with an excitation wavelength of 532 nm using a laser power  $< 0.1\text{ mW}$  to avoid the damage of the samples during the measurement.

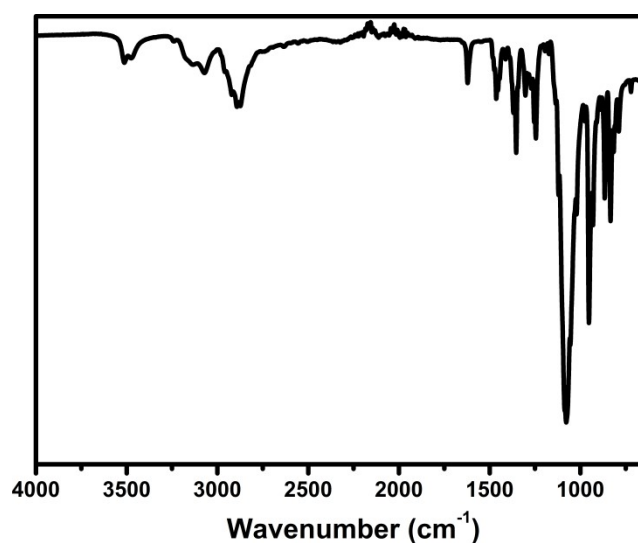

**Figure S9.** IR spectrum of **1**. The main peaks at 2894 are tentatively assigned the  $\delta(\text{CH}_2)$  and at  $1078\text{ cm}^{-1}$  are tentatively assigned the  $\nu(\text{ClO}_4)$  and  $\nu(\text{C-O})$ .

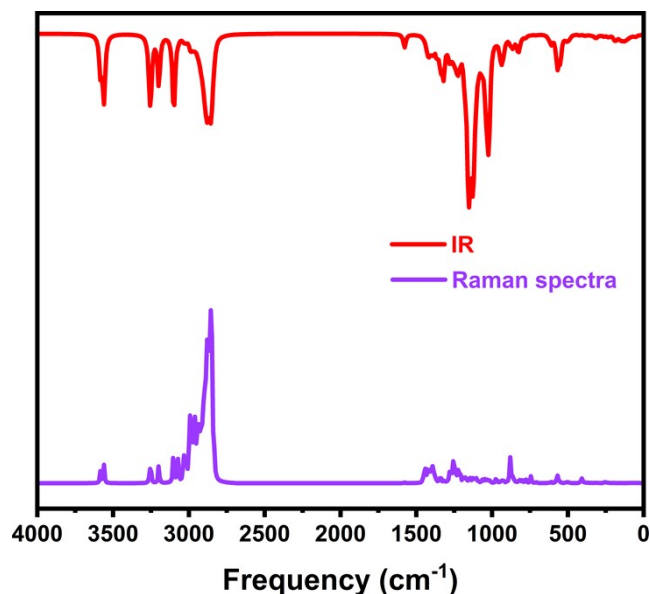

**Figure S10.** Calculated IR spectrum and Raman spectra of **1**. The main peaks at 2894  $\text{cm}^{-1}$  are tentatively assigned the  $\delta(\text{CH}_2)$  and at 1078  $\text{cm}^{-1}$  are tentatively assigned the  $\nu(\text{ClO}_4)$  and  $\nu(\text{C-O})$ .

**Table S2.** Measured and calculated vibration wavenumbers ( $\text{cm}^{-1}$ ) of **1** and proposed assignments of the observed Raman and IR bands.

| Observed wavenumbers ( $\text{cm}^{-1}$ ) |      | Calculated wavenumbers ( $\text{cm}^{-1}$ ) | Proposed assignments                                                                          |
|-------------------------------------------|------|---------------------------------------------|-----------------------------------------------------------------------------------------------|
| Raman                                     | IR   |                                             |                                                                                               |
| 77                                        | -    | 65                                          | $\tau(\text{CH}_2)$ twisting                                                                  |
| 159                                       | -    | 143                                         | $\omega(\text{C-O-C})$ wagging, $\omega(\text{CH}_2)$ wagging                                 |
| 223                                       | -    | 198                                         | $\omega(\text{C-O-C})$ wagging                                                                |
| 268                                       | -    | 255                                         | $\omega(\text{CH}_2)$ wagging                                                                 |
| 326                                       | -    | 325                                         | $\omega(\text{CH}_2)$ wagging                                                                 |
| 383                                       | -    | 389                                         | $\omega(\text{CH}_2)$ wagging                                                                 |
| 404                                       | -    | 432                                         | $\omega(\text{Cl-O})$ wagging                                                                 |
| 459                                       | -    | 447                                         | $\omega(\text{CH}_2)$ wagging                                                                 |
| 524                                       | -    | 523                                         | $\omega(\text{CH}_2)$ wagging, $\omega(\text{NH}_2)$ wagging                                  |
| 568                                       | -    | 581                                         | $\delta(\text{C-O})$ stretching                                                               |
| 585                                       | -    | 594                                         | (C-O-C) bending                                                                               |
| 625                                       | -    | 642                                         | $\omega(\text{OH})$ wagging                                                                   |
| 757                                       | 753  | 752                                         | $\tau(\text{CH}_2)$ twisting                                                                  |
| 791                                       | 788  | 784                                         | $\tau(\text{CH}_2)$ twisting                                                                  |
| 809                                       | 816  | 815                                         | $\tau(\text{CH}_2)$ twisting                                                                  |
| 830                                       | 834  | 825                                         | $\tau(\text{CH}_2)$ twisting                                                                  |
| 869                                       | 866  | 873                                         | $\omega(\text{CH}_2)$ wagging                                                                 |
| 889                                       | 887  | 889                                         | $\omega(\text{NH}_2)$ wagging                                                                 |
| 910                                       | 909  | 906                                         | $\omega(\text{CH}_2)$ wagging, $\omega(\text{NH}_2)$ wagging                                  |
| 934                                       | 931  | 927                                         | $\delta(\text{ClO})$ stretching, $\omega(\text{CH}_2)$ wagging, $\omega(\text{NH}_2)$ wagging |
| 979                                       | 976  | 985                                         | $\omega(\text{CH}_2)$ wagging, $\omega(\text{NH}_2)$ wagging                                  |
| 1025                                      | 1021 | 1024                                        | $\delta(\text{C-C})$ stretching                                                               |

|      |      |      |                                                                 |
|------|------|------|-----------------------------------------------------------------|
| 1091 | 1077 | 1075 | $\rho(\text{ClO}_2)$ rocking                                    |
| 1124 | 1121 | 1120 | $\omega(\text{CH}_2)$ wagging                                   |
| 1140 | 1136 | 1139 | $\omega(\text{CH}_2)$ wagging, $\delta(\text{C-O})$ stretching  |
| 1153 | 1173 | 1166 | $\omega(\text{CH}_2)$ wagging, $\omega(\text{NH}_2)$ wagging    |
| 1200 | 1194 | 1181 | $\tau(\text{CH}_2)$ twisting, $\delta(\text{ClO})$ stretching   |
| 1216 | -    | 1212 | $\omega(\text{CH}_2)$ wagging                                   |
| 1245 | 1245 | 1147 | $\omega(\text{CH}_2)$ wagging                                   |
| 1276 | 1272 | 1277 | $\tau(\text{CH}_2)$ twisting                                    |
| 1287 | 1303 | 1294 | $\omega(\text{CH}_2)$ wagging                                   |
| 1309 | 1354 | 1345 | $\tau(\text{CH}_2)$ twisting                                    |
| 1439 | 1412 | 1412 | $\delta(\text{CH}_2)$ scissoring                                |
| 1464 | -    | 1436 | $\delta(\text{CH}_2)$ scissoring, $\omega(\text{NH}_2)$ wagging |
| 1474 | 1464 | 1470 | $\delta(\text{CH}_2)$ scissoring                                |
| 1486 | -    | 1491 | $\delta(\text{CH}_2)$ scissoring                                |
| 1527 | -    | 1514 | $\delta(\text{CH}_2)$ scissoring                                |
| 2966 | 2958 | 2960 | $\delta(\text{CH}_2)$ stretching                                |
| 2980 | -    | 2981 | $\delta(\text{CH}_2)$ stretching                                |
| 2995 | -    | 2998 | $\delta(\text{CH}_2)$ stretching                                |
| 3013 | -    | 3023 | $\delta(\text{CH}_2)$ stretching                                |
| 3037 | -    | 3037 | $\delta(\text{CH}_2)$ stretching                                |
| 3071 | 3071 | 3123 | $\delta(\text{CH}_2)$ stretching                                |
| 3522 | 3475 | 3429 | $\omega(\text{NH}_2)$ stretching                                |
| 3739 | 3736 | 3747 | $\nu(\text{OH})$ stretching                                     |

---

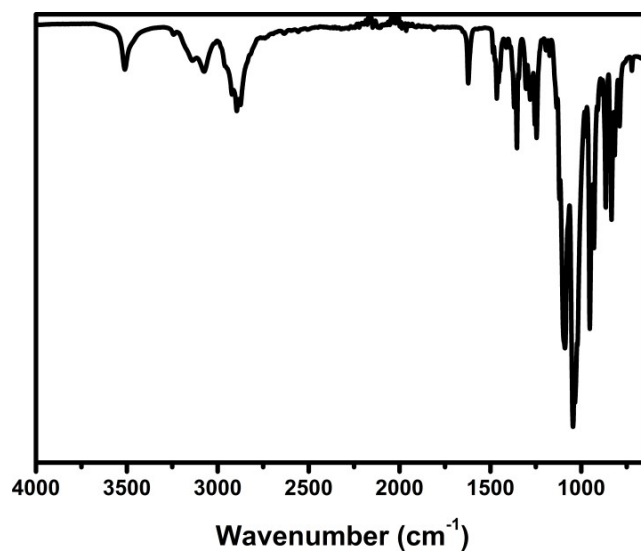

**Figure S11.** IR spectrum of **2**. The main peaks at 2895 cm<sup>-1</sup> are tentatively assigned the  $\delta(\text{CH}_2)$  and at 1045 cm<sup>-1</sup> are tentatively assigned the  $\nu(\text{BF}_4)$  and  $\nu(\text{C-O})$ . Notation used:  $\delta$ , stretching,  $\nu$ , vibrations.

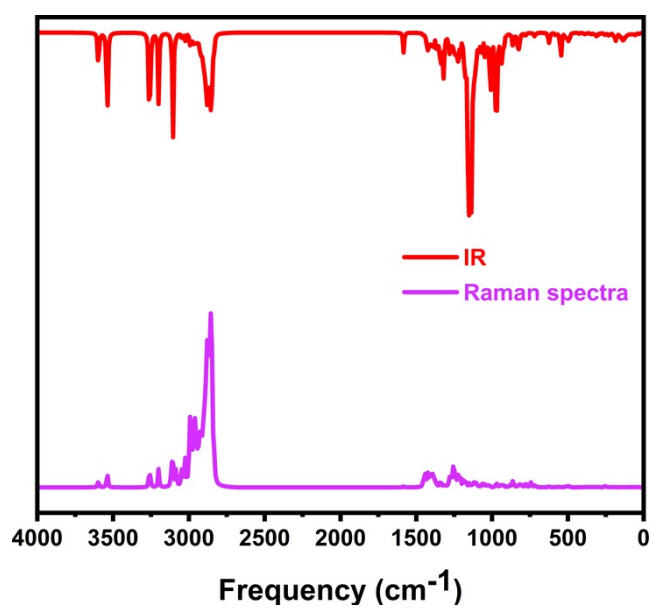

**Figure S12.** Calculated IR spectrum and Raman spectra of **2**. The main peaks at 2895 cm<sup>-1</sup> are tentatively assigned the  $\delta(\text{CH}_2)$  and at 1045 cm<sup>-1</sup> are tentatively assigned the  $\nu(\text{BF}_4)$  and  $\nu(\text{C-O})$ . Notation used:  $\delta$ , stretching,  $\nu$ , vibrations.

**Table S3.** Measured and calculated vibration wavenumbers (cm<sup>-1</sup>) of **2** and proposed assignments of the observed Raman and IR bands.

| Observed wavenumbers (cm <sup>-1</sup> ) |      | Calculated wavenumbers (cm <sup>-1</sup> ) | Proposed assignments                                            |
|------------------------------------------|------|--------------------------------------------|-----------------------------------------------------------------|
| Raman                                    | IR   |                                            |                                                                 |
| 76                                       | -    | 77                                         | $\tau(\text{CH}_2)$ twisting                                    |
| 107                                      | -    | 109                                        | $\tau(\text{CH}_2)$ twisting                                    |
| 167                                      | -    | 169                                        | $\omega(\text{C-O-C})$ wagging                                  |
| 265                                      | -    | 268                                        | $\omega(\text{CH}_2)$ wagging                                   |
| 322                                      | -    | 323                                        | $\omega(\text{CH}_2)$ wagging                                   |
| 379                                      | -    | 370                                        | $\omega(\text{CH}_2)$ wagging, $\omega(\text{NH}_2)$ wagging    |
| 486                                      | -    | 450                                        | $\omega(\text{CH}_2)$ wagging, $\omega(\text{NH}_2)$ wagging    |
| 524                                      | -    | 524                                        | $\rho(\text{BF}_4)$ rocking                                     |
| 566                                      | -    | 546                                        | $\omega(\text{CH}_2)$ wagging                                   |
| 585                                      | -    | 583                                        | (C-O-C) bending                                                 |
| 631                                      | -    | 655                                        | $\omega(\text{OH})$ wagging                                     |
| 725                                      | 721  | 752                                        | $\tau(\text{CH}_2)$ twisting                                    |
| 766                                      | 789  | 760                                        | $\delta(\text{B-F})$ stretching                                 |
| 789                                      | 815  | 816                                        | $\tau(\text{CH}_2)$ twisting                                    |
| 832                                      | 833  | 827                                        | $\tau(\text{CH}_2)$ twisting                                    |
| 870                                      | 865  | 872                                        | $\omega(\text{CH}_2)$ wagging                                   |
| 887                                      | 887  | 890                                        | $\delta(\text{C-N})$ stretching                                 |
| 911                                      | 909  | 912                                        | $\omega(\text{CH}_2)$ wagging, $\delta(\text{C-C})$ stretching  |
| 933                                      | 953  | 927                                        | $\omega(\text{CH}_2)$ wagging, $\omega(\text{NH}_2)$ wagging    |
| 979                                      | 976  | 985                                        | $\omega(\text{CH}_2)$ wagging, $\omega(\text{NH}_2)$ wagging    |
| 1022                                     | 1021 | 1021                                       | $\delta(\text{C-C})$ stretching, $\omega(\text{BF})$ wagging    |
| 1047                                     | 1045 | 1060                                       | $\omega(\text{BF})$ wagging, $\omega(\text{NH}_2)$ wagging      |
| 1090                                     | 1090 | 1091                                       | $\omega(\text{CH}_2)$ wagging, $\omega(\text{NH}_2)$ wagging    |
| 1124                                     | 1120 | 1123                                       | $\omega(\text{CH}_2)$ wagging                                   |
| 1140                                     | 1136 | 1141                                       | $\omega(\text{CH}_2)$ wagging, $\delta(\text{C-O})$ stretching  |
| 1152                                     | -    | 1159                                       | $\omega(\text{CH}_2)$ wagging, $\omega(\text{NH}_2)$ wagging    |
| 1177                                     | 1174 | 1178                                       | $\tau(\text{CH}_2)$ twisting, $\tau(\text{NH}_2)$ twisting      |
| 1196                                     | 1194 | 1197                                       | $\omega(\text{CH}_2)$ wagging, $\delta(\text{BF})$ stretching   |
| 1245                                     | 1246 | 1145                                       | $\delta(\text{C-O})$ stretching                                 |
| 1274                                     | -    | 1276                                       | $\tau(\text{CH}_2)$ twisting                                    |
| 1285                                     | 1281 | 1287                                       | $\omega(\text{CH}_2)$ wagging                                   |
| 1306                                     | 1306 | 1308                                       | $\omega(\text{CH}_2)$ wagging                                   |
| -                                        | 1354 | 1347                                       | $\tau(\text{CH}_2)$ twisting, $\delta(\text{C-O})$ stretching   |
| 1411                                     | 1413 | 1412                                       | $\omega(\text{CH}_2)$ wagging                                   |
| 1453                                     | -    | 1453                                       | $\delta(\text{CH}_2)$ scissoring                                |
| 1463                                     | 1466 | 1461                                       | $\delta(\text{CH}_2)$ scissoring, $\omega(\text{NH}_2)$ wagging |
| 1474                                     | 1475 | 1474                                       | $\delta(\text{CH}_2)$ scissoring                                |
| 1486                                     | 1487 | 1491                                       | $\delta(\text{CH}_2)$ scissoring                                |
| 1527                                     | -    | 1514                                       | $\delta(\text{CH}_2)$ scissoring                                |

|      |      |      |                                  |
|------|------|------|----------------------------------|
| 2965 | -    | 2981 | $\delta(\text{CH}_2)$ stretching |
| 2997 | 3002 | 2996 | $\delta(\text{CH}_2)$ stretching |
| 3018 | -    | 3020 | $\delta(\text{CH}_2)$ stretching |
| 3041 | -    | 3040 | $\delta(\text{CH}_2)$ stretching |
| 3077 | 3074 | 3078 | $\delta(\text{CH}_2)$ stretching |
| 3139 | 3138 | 3138 | $\omega(\text{NH}_2)$ stretching |
| 3247 | 3242 | 3248 | $\omega(\text{NH}_2)$ stretching |
| 3512 | 3511 | -    | $\omega(\text{NH}_2)$ stretching |
| 3724 | 3724 | 3725 | $\delta(\text{OH})$ stretching   |
| 3786 | 3784 | 3786 | $\delta(\text{OH})$ stretching   |

---



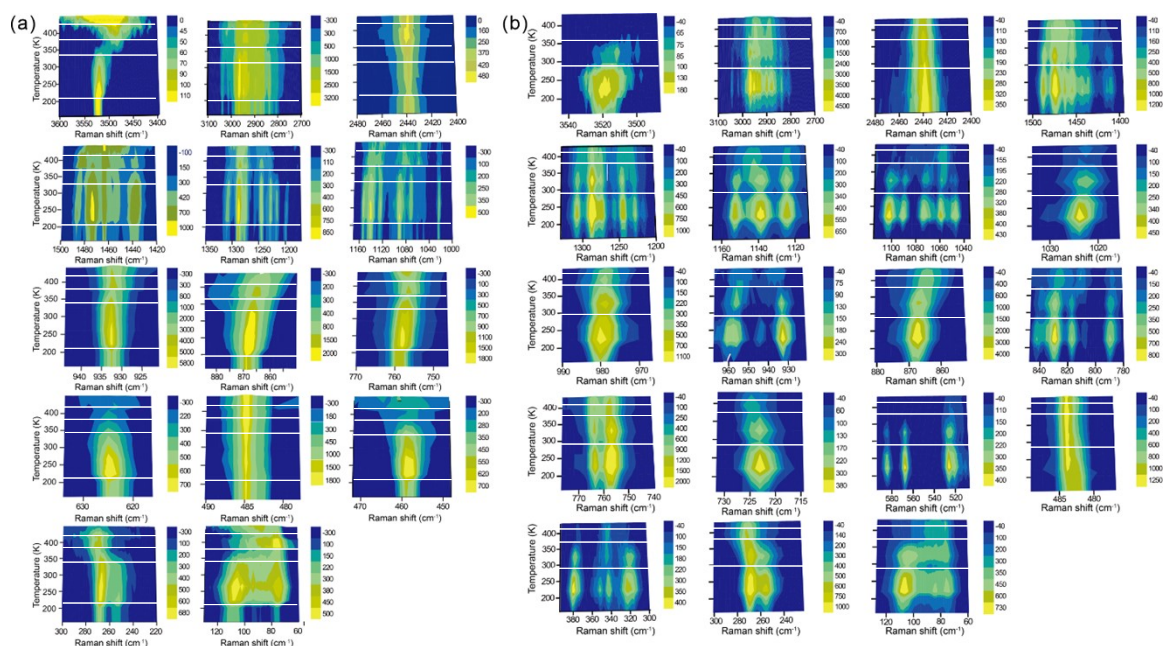

**Figure S13.** Temperature-dependent Raman spectra for **1** (a) and **2** (b) crystals in the range from 60 to 3900  $\text{cm}^{-1}$ . The white dashed line indicates the phase transition location.

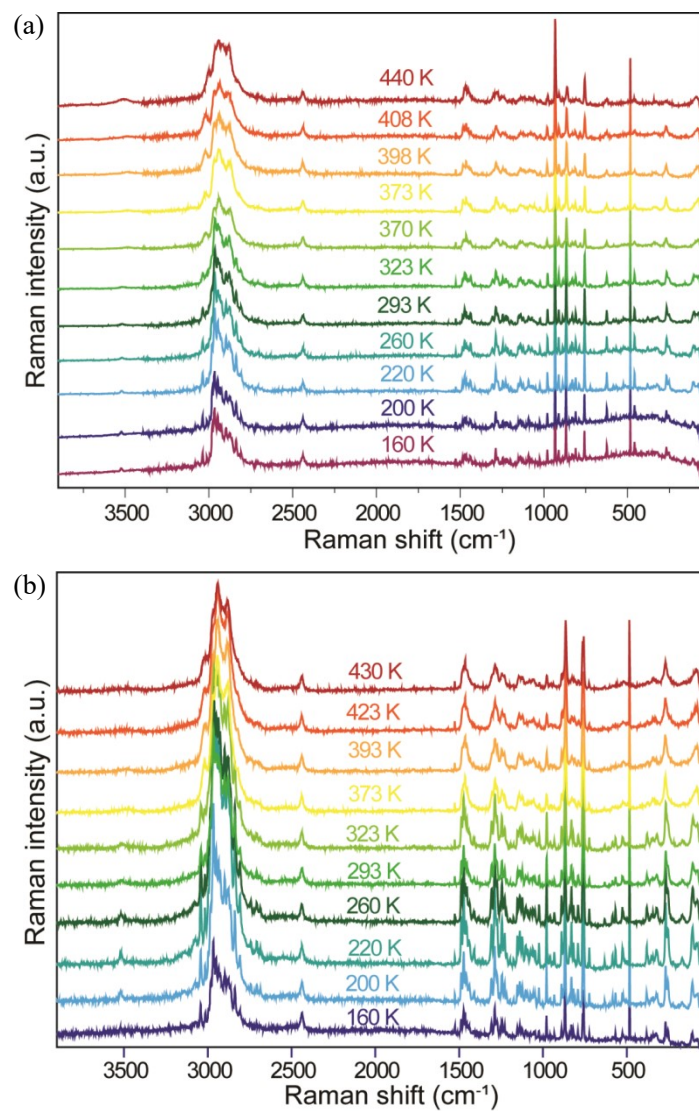

**Figure S14.** Raman spectra in the 60-3900  $\text{cm}^{-1}$  region for 1 (a) and 2 (b) at different temperature.

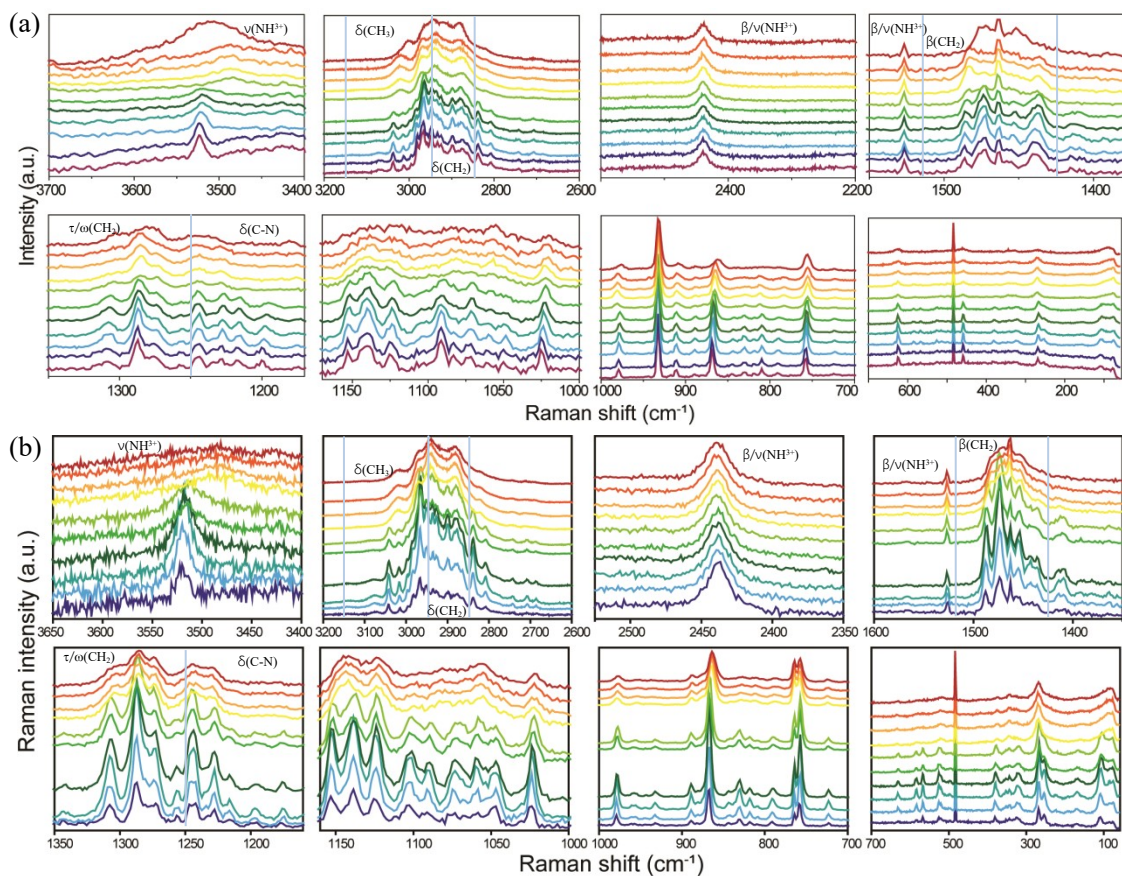

**Figure S15.** Raman modes for **1** (a) and **2** (b) at different temperature. Notation used:  $\delta$ , stretching,  $\beta$ , bending;  $\tau$ , twisting;  $\omega$ , wagging, and  $\nu$ , other vibrations.

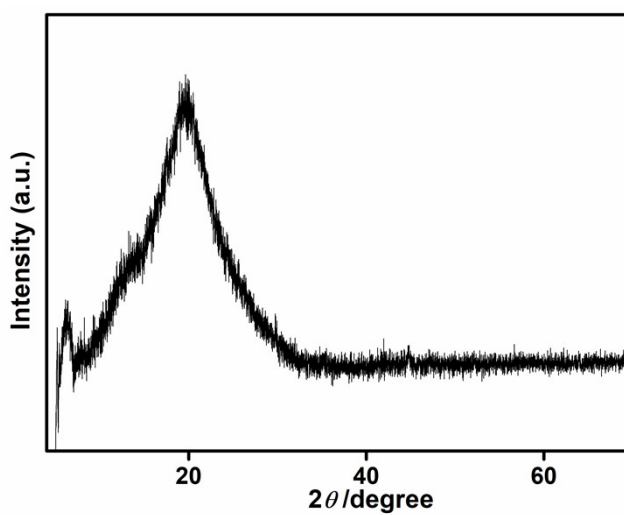

**Figure S16.** The powder X-ray diffraction of **2** at 430 K.

## References

1. O. V. Dolomanov, L. J. Bourhis, R. J. Gildea, J. A. Howard and H. Puschmann, *J. Appl. Crystallogr.*, 2009, **42**, 339-341.
2. G. Sheldrick, *SHELXL-97, program for X-ray crystal structure refinement. University of Göttingen, Germany Göttingen, 1997.*
3. A. SIR92, Altomare, G. Cascarano, C. Giacovazzo, A. Guagliardi, MC Burla, G. Polidori, MJ Camalli, *J. Appl. Crystallogr.*, 1994, **27**, 435-436.
